# Supplementary material for: Predictors of the CD24/CD11b Biomarker among Healthy Subjects
Source: MDPI journal article supplement (doi:10.3390/jpm11090939), 2021-09-21
Supplement: s1 [file s1]

**Supplementary Table S1.** Benign tumor distribution

|                                  | Percent |
|----------------------------------|---------|
| Benign tumor of colon and rectum | 18.5    |
| Benign neoplasm of skin          | 10.7    |
| Benign neoplasm of thyroid       | 8.2     |
| Benign tumor of esophagus        | 1.1     |
| Benign tumor of liver            | 5.0     |
| Benign tumor of prostate         | 5.0     |
| Benign tumor of bladder          | 3.9     |
| Benign tumor of breast           | 7.5     |
| Benign tumor of kidney           | 3.6     |

**Supplementary Table S2.** The result for multicollinearity among variables in the multivariate logistic regression model

|                                      | Tolerance | Variance Inflation Factor (VIF) |
|--------------------------------------|-----------|---------------------------------|
| Age                                  | 0.883     | 1.133                           |
| Gender (Female vs Male)              | 0.972     | 1.029                           |
| Smoking (Smoking vs Non Smoking)     | 0.963     | 1.039                           |
| Overweight (Yes vs No)               | 0.911     | 1.098                           |
| Background Disease                   | 0.843     | 1.187                           |
| Family History of Cancer (Yes vs No) | 0.984     | 1.017                           |
| Physical Activity (%)                | 0.955     | 1.048                           |
| CRP (Normal vs Elevated)             | 0.942     | 1.061                           |
| Cancer in the past (%)               | 0.890     | 1.124                           |
